# Supplementary material for: Nicotinic acid suppresses liver cancer metastasis via histone lysine nicotinylation
Source: Research Square preprint supplement (doi:10.21203/rs.3.rs-3973350/v1), 2024-03-12
Supplement: Supplementary file 1 [file cd580a549ccd366b8efb90b2.xlsx]

## Sheet: Sheet1
Real-time RT-PCR
GAPDH	Forward	CAGCAAGAGCACAAGAGGAA
	Reverse	CCCCTCTTCAAGGGGTCTAC
CFAP221	Forward	CACAACTCAGCTCTCTGGCA
	Reverse	GAGAACCAGGGACTGGAAGC
CMC2	Forward	TCTCCACACTTGCACACTGA
	Reverse	CCCTGCTCTTGGTCCTGTTT
PPFIA1	Forward	TGCAAACTTCCGGGTGACTT
	Reverse	GTTCCTGATACATTGCCGTCC
ChIP-qPCR
CFAP221	Forward	ATGAGTAATAGAAGCAGTGA
	Reverse	TCATGAAGTTCACAGTGATC
CMC2	Forward	AGACCATGGAAACCCACCTC
	Reverse	ATGCAAGTCCAAAATCCAGC
PPFIA1	Forward	GCCCTGGCCCGAGCGGGCTC
	Reverse	GTATCAGGTGCGGCGGAAGC
Specific PPFIA1 promoter sequence close to the peak with hyper histone Knic signal,
GGGGCCCAGGCGTCACCGGCGCGTCCCGGTCTCCGCGGCGGCCACGCAGCCGATTAGATGTCTCCGCGGGGAAGGGTGCGCTCCGGGACGGGTGGGGGCGAGGCCGCGGCGCCGGGTCGCGCTGGGAGAGCTCCGGCGGGACACCCGCGCCCCAAGGGACGGCTCCGGGGACTGCGCGCTGCCCCTCCCCGAGCCCCGCGCCCCGTGACCCGGGCGCTGGGGCGAGGGGCGGGGACCTGTGGCCGCTGAAAGCCCTGGCCCGAGCGGGCTCCGTTGTCAACGGTCCTCACCCCCCGGGGTTCGGGGCTTCCGCCGCACCTGATACAGGAGGGGAGGAGTGCGGCT
